# Supplementary material
Source: Springer Nature journal article supplement (https://www.springermedizin.de/resource/supplementary/12993_2011_366_MOESM2_ESM.pdf/9617630)
Supplement: MOESM2 [file 9617630]

A)

## Distance first 5min Activity meter

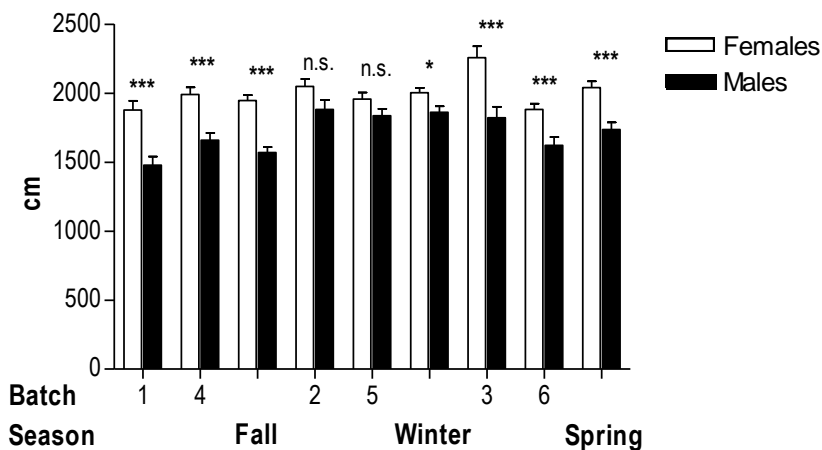Post hoc Duncan's test ( $p < 0.05$ ):

BATCH: 1 and 6 are different from 2, 3 and 5

4 is different from 3

SEASON: Fall is different from Winter and Spring

B)

## Distance last 5min Activity meter

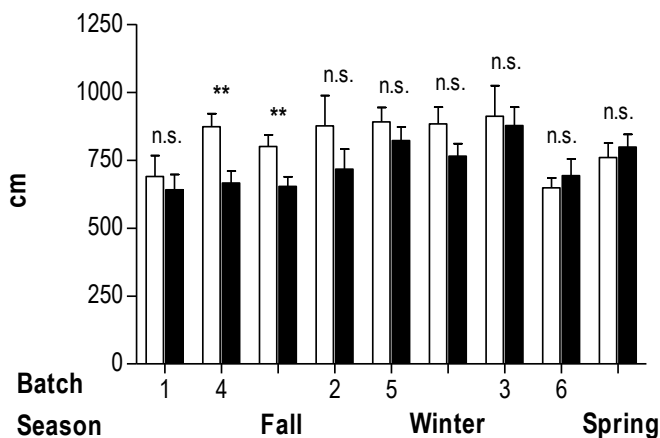Post hoc Duncan's test ( $p < 0.05$ ):

BATCH: 1 and 6 are different from 3 and 5

SEASON: n.s.
